# Supplementary material
Source: publisher figshare collection journal article supplement (https://plos.figshare.com/articles/dataset/_/3461636)
Supplement: Supplementary file 1 [file 1 › S1 Table.XLSX]

## Sheet: Sheet1
State or Province	Region	County
Pennsylvania	Allegheny Mountains and Ridge and Valley	Lucerne, Lycoming, Schuylkill, Columbia, Wyoming, Wayne
New York	Adirondack Mountains	Clinton, Herkimer and Lewis
	Canisteo River	Stuben
Maine	Appalachian Mountains	Hancock, Oxford, Waldo, Washington
	Bull Hill	Hancock
Quebec	Chaudiére-Appalches	L’Amiante, L’Érable
	Bas-Saint-Laurent	Rivière-du-Loup
	Gaspésie-Îles-de-la-Madeleine	La Haute-Gaspésie, La Matanie, La Matapédia, La Mitis
	Capitale-Nationale	La Côte-de-Beaupré
