# Supplementary material
Source: publisher figshare collection journal article supplement (https://plos.figshare.com/articles/dataset/_/3461636)
Supplement: Supplementary file 1 [file 1 › S2 File.PDF]

# Redistribution Rights

| Description                                            | Data Source                                    | File Name                           | Directory | Redistribution<br>(see FAQ below) |
|--------------------------------------------------------|------------------------------------------------|-------------------------------------|-----------|-----------------------------------|
| <b>World</b>                                           |                                                |                                     |           |                                   |
| Countries                                              | DeLorme                                        | country.*                           | \world    | Yes 1,2,3                         |
| Administrative Units                                   | DeLorme                                        | admin.*                             | \world    | Yes 1,2,3                         |
| Airports                                               | DeLorme                                        | airports.*                          | \world    | Yes 1,2,3                         |
| Contours                                               | DeLorme                                        | contours.*                          | \world    | Yes 1,2,3                         |
| Roads                                                  | DeLorme                                        | roads.*                             | \world    | Yes 1,2,3                         |
| Railroads                                              | DeLorme                                        | railroads.*                         | \world    | Yes 1,2,3                         |
| Continents                                             | ArcWorld Supplement                            | continent.*                         | \world    | Yes 1,2,3                         |
| Regions                                                | ArcWorld Supplement                            | region.*                            | \world    | Yes 1,2,3                         |
| Census IPC Demographics (table)                        | US Census International Division, CIA Factbook | cntry_ipc.*                         | \world    | Yes 1,2,3                         |
| Country Memberships of Political Organizations (table) | CIA Factbook                                   | pol_org.*                           | \world    | Yes 4                             |
| Cities                                                 | ArcWorld                                       | cities.*                            | \world    | Yes 1,2,3                         |
| Populated Places                                       | DeLorme                                        | pop_places.*                        | \world    | Yes 1,2,3                         |
| Urban Areas                                            | DeLorme                                        | urban_areas.*                       | \world    | Yes 1,2,3                         |
| Gazetteer                                              | DCW                                            | gaz.*                               | \world    | Yes 1,2,3                         |
| Linear Water                                           | DeLorme                                        | hydrolines.*                        | \world    | Yes 1,2,3                         |
| Water Bodies                                           | DeLorme                                        | hydropolys.*                        | \world    | Yes 1,2,3                         |
| Drainage Systems, Lakes, and Rivers                    | ArcWorld                                       | lakes.*,<br>rivers.*,<br>drainage.* | \world    | Yes 1,2,3                         |
| World Wildlife Fund Terrestrial Ecoregions             | World Wildlife Fund, DCW                       | wwf_terr.*                          | \world    | No                                |

|                                       |                          |               |               |           |
|---------------------------------------|--------------------------|---------------|---------------|-----------|
| World Wildlife Fund Marine Ecoregions | World Wildlife Fund, DCW | wwf_mar.*     | \world        | No        |
| UTM Zones                             | ArcWorld Supplement, NGA | utmzone.*     | \world        | Yes 1,2,3 |
| Time Zones                            | Esri                     | timezone.*    | \world        | Yes 1,2,3 |
| Latitude and Longitude Grids          | Esri                     | latlong.*     | \world        | Yes 1,2,3 |
| Named Latitudes and Longitudes        | Esri                     | geogrid.*     | \world        | Yes 1,2,3 |
| World Map Background                  | Esri                     | world30.*     | \world        | Yes 1,2,3 |
| <b>StreetMap North America</b>        |                          |               |               |           |
| States and Provinces                  | TomTom                   | states.*      | \streetmap_na | Yes 1,2   |
| State and Province Boundaries         | TomTom                   | stborder.*    | \streetmap_na | Yes 1,2   |
| US Counties                           | TomTom                   | counties.*    | \streetmap_na | Yes 1,2   |
| US County Boundaries                  | TomTom                   | countybnd.*   | \streetmap_na | Yes 1,2   |
| City Points                           | TomTom                   | cities.*      | \streetmap_na | Yes 1,2   |
| Major Cities                          | TomTom                   | citiesmjr.*   | \streetmap_na | Yes 1,2   |
| City Areas                            | TomTom                   | citylim.*     | \streetmap_na | Yes 1,2   |
| Postal Points                         | TomTom                   | zipcentr.*    | \streetmap_na | Yes 1,2   |
| Postal Areas                          | TomTom                   | zip5.*        | \streetmap_na | Yes 1,2   |
| Maneuvers                             | TomTom                   | maneuver.*    | \streetmap_na | Yes 1     |
| Highway Exits                         | TomTom                   | exits.*       | \streetmap_na | Yes 1     |
| Connector Roads                       | TomTom                   | connectors.*  | \streetmap_na | Yes 1,2   |
| Major Roads                           | TomTom                   | mroads.*      | \streetmap_na | Yes 1,2   |
| Highways                              | TomTom                   | highways.*    | \streetmap_na | Yes 1,2   |
| Interstate Highways                   | TomTom                   | interstates.* | \streetmap_na | Yes 1,2   |
| Railroads                             | TomTom                   | railroads.*   | \streetmap_na | Yes 1,2   |
| Lakes                                 | TomTom                   | lakes_na.*    | \streetmap_na | Yes 1,2   |
| Rivers                                | TomTom                   | rivers.*      | \streetmap_na | Yes 1,2   |
| Water Polygons                        | TomTom                   | waterp.*      | \streetmap_na | Yes 1,2   |

|                                      |                                                                       |                            |               |                                                           |
|--------------------------------------|-----------------------------------------------------------------------|----------------------------|---------------|-----------------------------------------------------------|
| Major Water Polygons                 | TomTom                                                                | waterpmjr.*                | \streetmap_na | Yes 1,2                                                   |
| Airports                             | TomTom                                                                | airports.*                 | \streetmap_na | Yes 1,2                                                   |
| Institutions                         | TomTom                                                                | institutions.*             | \streetmap_na | Yes 1,2                                                   |
| Large Area Landmarks                 | TomTom                                                                | landmarks.*                | \streetmap_na | Yes 1,2                                                   |
| Parks                                | TomTom                                                                | parks.*                    | \streetmap_na | Yes 1,2                                                   |
| Recreation Areas                     | TomTom                                                                | recarea.*                  | \streetmap_na | Yes 1,2                                                   |
| Transportation Terminals             | TomTom                                                                | tranterm.*                 | \streetmap_na | Yes 1,2                                                   |
| Retail Centers                       | TomTom                                                                | retail_center.*            | \streetmap_na | Yes 1,2                                                   |
| Cartographic Streets                 | TomTom                                                                | streetscarto.*             | \streetmap_na | Yes 1                                                     |
| Detailed Streets                     | TomTom                                                                | streets.*                  | \streetmap_na | Yes 1                                                     |
| <b>United States</b>                 |                                                                       |                            |               |                                                           |
| States and Counties (generalized)    | ArcUSA, US Census, Esri                                               | states.*, counties.*       | \usa\census   | Yes 1,2,3                                                 |
| States and Counties                  | Esri, derived from TomTom, US Census                                  | dtl_st.*, dtl_cnty.*       | \usa\census   | TomTom - Yes 1,2; US Census - Yes 1,2,3; Esri - Yes 1,2,3 |
| State and County Boundaries          | Esri, derived from TomTom                                             | dtl_st_ln.*, dtl_cty_ln.*  | \usa\census   | TomTom - Yes 1,2                                          |
| County Population Estimates (tables) | US Census, Federal State Cooperative Program for Population Estimates | popestmt90.*, popestmt00.* | \usa\census   | Yes 4                                                     |
| Census Tracts                        | TomTom, US Census, Esri                                               | tracts.*                   | \usa\census   | TomTom - Yes 1,2; US Census - Yes 1,2,3; Esri - Yes 1,2,3 |
| Census Feature Class Codes (table)   | US Census                                                             | cfcc.dbf                   | \usa\census   | Yes 4                                                     |
| 111th Congressional Districts        | Esri                                                                  | cd111.*                    | \usa\census   | Yes 1,2,3                                                 |
| 112th Congressional                  | Esri                                                                  | cd112.*                    | \usa\census   | Yes 1,2,3                                                 |

|                                                     |                                       |                                   |                |                                                           |
|-----------------------------------------------------|---------------------------------------|-----------------------------------|----------------|-----------------------------------------------------------|
| Districts                                           |                                       |                                   |                |                                                           |
| Cities                                              | US Census                             | cities.*                          | \usa\census    | Yes 4                                                     |
| Populated Place Points                              | US Census                             | places.*                          | \usa\census    | Yes 4                                                     |
| Populated Place Areas                               | TomTom, US Census                     | placeply.*                        | \usa\census    | Yes 1,2                                                   |
| Core Based Statistical Areas                        | TomTom                                | cbsa.*                            | \usa\census    | Yes 1,2                                                   |
| Highways                                            | Esri                                  | highways.*                        | \usa\trans     | Yes 1,2,3                                                 |
| Major Highways                                      | Esri                                  | mjr_hwys.*                        | \usa\trans     | Yes 1,2,3                                                 |
| National Transportation Atlas - Interstate Highways | US Bureau Transportation Statistics   | intrstat.*                        | \usa\trans     | Yes 4                                                     |
| National Transportation Atlas - Railroads           | US Bureau Transportation Statistics   | rail100k.*                        | \usa\trans     | Yes 4                                                     |
| Census Urbanized Areas                              | US Census                             | urban.*                           | \usa\census    | Yes 4                                                     |
| Major Parks                                         | National Park Service, ArcUSA, TomTom | parks.*                           | \usa\landmarks | Yes 1,2                                                   |
| Drainage Systems, Lakes, and Rivers (generalized)   | ArcWorld                              | drainage.*, lakes.*, and rivers.* | \usa\hydro     | Yes 1,2,3                                                 |
| Telephone Area Code Boundaries                      | TomTom                                | areacode.*                        | \usa\census    | Yes 1,2                                                   |
| ZIP Code Points                                     | TomTom, US Census, Esri               | zip_usa.*                         | \usa\census    | TomTom - Yes 1,2; Esri - Yes 1,2,3; US Census - Yes 1,2,3 |
| ZIP Code Areas (Five-Digit)                         | TomTom, US Census, Esri               | zip_poly.*                        | \usa\census    | TomTom - Yes 1,2; Esri - Yes 1,2,3; US Census - Yes 1,2,3 |
| ZIP Code Areas (Three-Digit)                        | Esri, derived from TomTom             | zip3.*                            | \usa\census    | TomTom - Yes 1,2; Esri - Yes 1,2,3; US Census - Yes       |

|                                                  |                                                                                        |                          |                |         |
|--------------------------------------------------|----------------------------------------------------------------------------------------|--------------------------|----------------|---------|
|                                                  |                                                                                        |                          |                | 1,2,3   |
| National Atlas - Airports                        | National Atlas of the United States                                                    | airports.*               | \usa\trans     | Yes 4   |
| National Atlas - Cities                          | National Atlas of the United States                                                    | cities_dtl.*             | \usa\census    | Yes 4   |
| National Atlas - Urbanized Areas                 | National Atlas of the United States                                                    | urban_dtl.*              | \usa\census    | Yes 4   |
| National Atlas - Federal and Indian Land Areas   | National Atlas of the United States                                                    | fedlandp.*               | \usa\landmarks | Yes 4   |
| National Atlas - Federal Land Lines              | National Atlas of the United States, USGS                                              | fedlandl.*               | \usa\landmarks | Yes 4   |
| National Atlas - Water Feature Areas and Lines   | National Atlas of the United States, USGS                                              | hydroply.*,<br>hydroln.* | \usa\hydro     | Yes 4   |
| National Atlas - Public Land Survey              | National Atlas of the United States, USGS                                              | publdsur.*               | \usa\other     | Yes 4   |
| National Atlas - Historic Earthquakes            | National Atlas of the United States, USGS                                              | quakehis.*               | \usa\landmarks | Yes 4   |
| National Atlas - Volcanoes                       | Smithsonian Institution, Global Volcanism Program, National Atlas of the United States | volcano.*                | \usa\landmarks | Yes 4   |
| Airports                                         | TomTom                                                                                 | airportp.*               | \usa\trans     | Yes 1,2 |
| Institutions                                     | TomTom                                                                                 | institut.*               | \usa\landmarks | Yes 1,2 |
| Large Area Landmarks                             | TomTom                                                                                 | lalndmrk.*               | \usa\landmarks | Yes 1,2 |
| Parks                                            | TomTom                                                                                 | park_dtl.*               | \usa\landmarks | Yes 1,2 |
| Recreation Areas                                 | TomTom                                                                                 | recareas.*               | \usa\landmarks | Yes 1,2 |
| Transportation Terminals                         | TomTom                                                                                 | tranterm.*               | \usa\trans     | Yes 1,2 |
| Geographic Names Information System - Buildings  | USGS - GNIS                                                                            | gblding.*                | \usa\landmarks | Yes 4   |
| Geographic Names Information System - Cemeteries | USGS - GNIS                                                                            | gcemetery.*              | \usa\landmarks | Yes 4   |

|                                                                             |                         |                                         |                |                                                           |
|-----------------------------------------------------------------------------|-------------------------|-----------------------------------------|----------------|-----------------------------------------------------------|
| Geographic Names Information System - Churches                              | USGS - GNIS             | gchurch.*                               | \usa\landmarks | Yes 4                                                     |
| Geographic Names Information System - Golf Locales                          | USGS - GNIS             | ggolf.*                                 | \usa\landmarks | Yes 4                                                     |
| Geographic Names Information System - Hospitals                             | USGS - GNIS             | ghospitl.*                              | \usa\landmarks | Yes 4                                                     |
| Geographic Names Information System - Locales                               | USGS - GNIS             | glocale.*                               | \usa\landmarks | Yes 4                                                     |
| Geographic Names Information System - Populated Places                      | USGS - GNIS             | gppl.*                                  | \usa\landmarks | Yes 4                                                     |
| Geographic Names Information System - Schools                               | USGS - GNIS             | gschools.*                              | \usa\landmarks | Yes 4                                                     |
| Geographic Names Information System - Summits                               | USGS - GNIS             | gsummit.*                               | \usa\landmarks | Yes 4                                                     |
| State Plane Zones (NAD 1927, NAD 1983)                                      | NOAA, USGS, Esri        | spcszn27.*,<br>spcszn83.*               | \usa\other     | Yes 1,2,3                                                 |
| USGS Topographic Quadrangle Series Indexes - 1:24,000, 1:100,000, 1:250,000 | ArcUSA                  | topoq24.*,<br>topoq100.*,<br>topoq250.* | \usa\other     | Yes 1,2,3                                                 |
| Census Block Groups                                                         | TomTom, US Census, Esri | blkgrp.*                                | \usa\census    | TomTom - Yes 1,2; US Census - Yes 1,2,3; Esri - Yes 1,2,3 |
| Census Block Centroid Populations                                           | US Census               | blockpop.*                              | \usa\census    | Yes 1,2                                                   |
| Rivers and Streams                                                          | USGS, Esri              | dtl_riv.*                               | \usa\hydro     | Yes 1,2,3                                                 |
| Water Bodies                                                                | USGS, Esri              | dtl_wat.*                               | \usa\hydro     | Yes 1,2,3                                                 |
| <b>Europe</b>                                                               |                         |                                         |                |                                                           |

|                                                   |                                |         |              |       |
|---------------------------------------------------|--------------------------------|---------|--------------|-------|
| Europe<br>Demographic -<br>NUTS 0<br>Demographics | Michael Bauer<br>Research GmbH | nuts0.* | \europe\data | Yes 1 |
| Europe<br>Demographic -<br>NUTS 1<br>Demographics | Michael Bauer<br>Research GmbH | nuts1.* | \europe\data | Yes 1 |
| Europe<br>Demographic -<br>NUTS 2<br>Demographics | Michael Bauer<br>Research GmbH | nuts2.* | \europe\data | Yes 1 |
| Europe<br>Demographic -<br>NUTS 3<br>Demographics | Michael Bauer<br>Research GmbH | nuts3.* | \europe\data | Yes 1 |

All data are available for internal use.

## Frequently Asked Questions (FAQ)

**Q:** Are all of the sample data provided on the Esri Data & Maps disks freely redistributable?

**A:** No. Much of the sample data are provided by multiple, third party data vendors under license to Esri for inclusion on these disks specifically for use with Esri software.

**Q:** What does the last column “Redistribution” on the Redistribution Rights matrix with its “Yes” or “No” answers mean?

**A:** Each data vendor has its own data licensing policies and may grant varying redistribution rights to end users. Please consult the Redistribution Rights Codes below to determine the redistribution rights for a certain sample data file provided on the CD-ROMs and DVD-ROMs. As used herein, “Geodata” shall mean any digital data set consisting of geographic data coordinates and associated attributes.

“No” Internal Use Only. No redistribution rights are granted by the data vendor and the data is for the end user's own internal use only.

“Yes 1” Redistribution rights are granted by the data vendor for hard-copy renditions or static, electronic map images (e.g. .gif, .jpeg, etc.) that are plotted, printed, or publicly displayed with proper metadata and source/copyright attribution to the respective data vendor(s).

“Yes 2” Geodata are redistributable with a Value-Added Software Application developed by Esri Business Partners on a royalty-free basis with proper metadata and source/copyright attribution to the respective data vendor(s).

“Yes 3” Geodata are redistributable without a Value-Added Software Application (i.e., adding the sample data to an existing, [non]commercial data set for redistribution) with proper metadata and source/copyright attribution to the respective data vendor(s).

“Yes 4” Public domain data from US government are freely redistributable with proper metadata and source attribution.

Q: Are there any legal terms and conditions I need to be aware of under this license to use the sample data provided on the Esri Data & Maps disks?

A: Yes. The terms and conditions below apply to all the sample data sets provided on the disks.

**High Risk Activities:** (a) The Software, Data, and Documentation are not fault-tolerant and are not designed, manufactured, or intended for use or resale for insurance underwriting or with critical health and safety or online control equipment in hazardous environments that require fail-safe performance, such as in the operation of nuclear facilities, aircraft navigation, or communication systems, air traffic control, emergency response, terrorism prevention or response, life support, or weapons systems ("High Risk Activities"). ESRI SPECIFICALLY DISCLAIMS ANY EXPRESS OR IMPLIED WARRANTY OF FITNESS FOR HIGH RISK ACTIVITIES.

(b) To the extent permitted by law, Licensee agrees to indemnify, defend, and hold Esri, its officers, directors, employees, agents, subcontractors, licensors, successors, and assigns harmless from and against any and all liability, losses, claims, expenses (including attorneys' fees), demands, or damages of any kind, including direct, indirect, special, punitive, incidental, or consequential damages, arising out of or in any way connected with Licensee's use or permitting the use by others of the Software, Data, and vendor's hardware for High Risk Activities. Delivery of the Software, Data, and vendor's hardware does not constitute a waiver of the rights and obligations set forth in this Article.

**Proprietary Rights and Copyright:** Licensee acknowledges that the Data and Related Materials contain proprietary and confidential property of Esri and its licensor(s). The Data and Related Materials are owned by Esri and its licensor(s) and are protected by United States copyright laws and applicable international copyright treaties and/or conventions.

**Limited Warranty and Disclaimer:** Esri warrants that the media upon which the Data and Related Materials are provided will be free from defects in materials and workmanship under normal use and service for a period of ninety (90) days from the date of receipt.

**THE DATA AND RELATED MATERIALS ARE EXCLUDED FROM THE LIMITED WARRANTY, AND THE LICENSEE EXPRESSLY ACKNOWLEDGES THAT THE DATA CONTAIN SOME NONCONFORMITIES, DEFECTS, OR ERRORS. ESRI DOES NOT WARRANT THAT THE DATA WILL MEET LICENSEE'S NEEDS OR EXPECTATIONS; THAT THE USE OF THE DATA WILL BE UNINTERRUPTED; OR THAT ALL NONCONFORMITIES, DEFECTS, OR ERRORS CAN OR WILL BE CORRECTED. ESRI IS NOT INVITING RELIANCE ON THESE DATA, AND THE LICENSEE SHOULD ALWAYS VERIFY ACTUAL DATA.**

**EXCEPT FOR THE LIMITED WARRANTY SET FORTH ABOVE, THE DATA AND RELATED MATERIALS CONTAINED THEREIN ARE PROVIDED "AS-IS," WITHOUT WARRANTY OF ANY KIND, EITHER EXPRESS OR IMPLIED, INCLUDING, BUT NOT LIMITED TO, THE IMPLIED WARRANTIES OF MERCHANTABILITY AND FITNESS FOR A PARTICULAR PURPOSE.**

**Exclusive Remedy and Limitation of Liability:** The entire liability of Esri or its licensor(s) and Licensee's exclusive remedy shall be to terminate the Agreement upon Licensee returning the Data and Related Materials to Esri with a copy of Licensee's invoice/receipt and Esri returning the license fees paid to Licensee.

**IN NO EVENT SHALL ESRI AND/OR ITS LICENSOR(S) BE LIABLE FOR COSTS OF PROCUREMENT OF SUBSTITUTE GOODS OR SERVICES; LOST PROFITS, LOST SALES, OR BUSINESS EXPENDITURES, INVESTMENTS, OR COMMITMENTS IN CONNECTION WITH ANY BUSINESS; LOSS OF ANY GOODWILL; OR FOR ANY INDIRECT, SPECIAL, INCIDENTAL, EXEMPLARY, OR CONSEQUENTIAL DAMAGES ARISING OUT OF THIS AGREEMENT OR USE OF THE DATA AND RELATED MATERIALS, HOWEVER CAUSED, ON ANY THEORY OF LIABILITY, AND WHETHER OR NOT ESRI OR ITS LICENSOR(S) HAVE BEEN ADVISED OF THE POSSIBILITY OF SUCH DAMAGE. THESE LIMITATIONS SHALL APPLY NOTWITHSTANDING ANY FAILURE OF ESSENTIAL PURPOSE OF ANY EXCLUSIVE REMEDY.**

**Third Party Beneficiary:** Esri's licensor(s) has (have) authorized Esri to (sub)distribute and (sub)license its (their) data as incorporated into the Data and Related Materials. As an intended third party beneficiary to this Agreement, the Esri licensor(s) is (are) entitled to directly enforce, in its own name, the rights and obligations undertaken by the Licensee and to seek all legal and equitable remedies as are afforded to Esri.

**Q:** How should I attribute the sample data provided on the CD-ROMs and DVD-ROMs if I use it as proscribed above?

**A:** In the event that the data vendor(s) has (have) granted the end user permission to redistribute the Geodata, please use proper proprietary or copyright attribution for the various data vendor(s), and provide the associated metadata file(s) with the Geodata. In

compliance with FGDC metadata standards, Esri has attempted to practice proper metadata methodologies by providing any data source information, descriptions, and file names to assist in this effort.
